# Supplementary material for: Analysis of Complete Genome Sequence of Acinetobacter baumannii Strain ATCC 19606 Reveals Novel Mobile Genetic Elements and Novel Prophage
Source: PubMed Central journal article supplement (PMC7760358; doi:10.3390/microorganisms8121851), 2020-11-24
Supplement: microorganisms-08-01851-s001.pdf [file microorganisms-08-01851-s001.pdf]

**Table S1.** Bacterial strains employed to determine the host range of the phage vB\_AbaS\_LC1.

| <b>Strains</b> | <b>ST<sup>1</sup></b> | <b>Spot <sup>2</sup></b> |
|----------------|-----------------------|--------------------------|
| Ab05_GEIH2010  | 186                   | -                        |
| Ab09_GEIH2010  | 297                   | -                        |
| Ab105_GEIH2010 | 2                     | -                        |
| Ab13_GEIH2010  | 79                    | -                        |
| Ab155_GEIH2000 | 2                     | -                        |
| Ab177_GEIH2000 | 2                     | -                        |
| Ab217_GEIH2010 | 2                     | -                        |
| Ab22_GEIH2010  | 52                    | -                        |
| Ab226_GEIH2010 | 181                   | -                        |
| Ab24_GEIH2010  | 255                   | +                        |
| Ab291_GEIH2010 | 265                   | +                        |
| Ab309_GEIH2010 | 267                   | -                        |
| Ab310_GEIH2010 | 268                   | -                        |
| Ab32_GEIH2010  | 2                     | -                        |
| Ab404_GEIH2010 | 80                    | -                        |
| Ab421_GEIH2010 | 2                     | -                        |
| Ab440_GEIH2010 | 187                   | -                        |
| Ab461_GEIH2010 | 2                     | -                        |
| Ab464_GEIH2010 | 272                   | -                        |

<sup>1</sup>ST: Sequence Type.

<sup>2</sup>Spot Test: clear spot (+), non spot (-).
